# Supplementary material
Source: PubMed Central journal article supplement (PMC4151733)
Supplement: 1409516111_pnas.201409516SI.pdf [file 1409516111_pnas.201409516SI.pdf]

# Supporting Information

Riehl et al. 10.1073/pnas.1409516111

Table S1. Archaeological sites and modern locations from where the barley grains were taken for  $\delta^{13}\text{C}$  analysis

| Site                               | Modern political geography | Map no. | Cultural typology            | Chronological range (mean values)               | Geographic latitude | Geographic longitude | No. of barley grains measured | No. of contextual units | Mean $\Delta^{13}\text{C}$ , ‰ | Minimum $\Delta^{13}\text{C}$ , ‰ |
|------------------------------------|----------------------------|---------|------------------------------|-------------------------------------------------|---------------------|----------------------|-------------------------------|-------------------------|--------------------------------|-----------------------------------|
| Küçüksu (RMIN_1815) <sup>A</sup>   | Turkey                     | 49      | Modern                       | Modern                                          | 41.5000000          | 33.7166700           | 6                             | 1                       | 17.4278312                     | 16.7133974                        |
| Tell Snan (GPS_437) <sup>B</sup>   | Syria                      | 42      | Modern                       | A.D. 1990                                       | 34.8780000          | 36.1170000           | 8                             | 1                       | 16.2451017                     | 15.653579                         |
| Membij (GPS_629) <sup>B</sup>      | Syria                      | 44      | Modern                       | A.D. 2000                                       | 36.4270000          | 37.6520000           | 12                            | 1                       | 14.4210374                     | 14.2732033                        |
| Chagar Bazar <sup>B</sup>          | Syria                      | 37      | Modern                       | A.D. 1998                                       | 36.8755930          | 40.8977090           | 5                             | 1                       | 16.2779377                     | 15.5812528                        |
| Zebdani (GPS_152) <sup>B</sup>     | Syria                      | 38      | Modern                       | A.D. 2000                                       | 33.7480000          | 36.1170000           | 16                            | 1                       | 15.6544162                     | 13.5358581                        |
| Tell Mozan <sup>B</sup>            | Syria                      | 35      | Modern                       | A.D. 1998                                       | 37.1200000          | 40.9300000           | 5                             | 1                       | 16.602726                      | 15.5801282                        |
| Tell Leilan <sup>B</sup>           | Syria                      | 52      | Modern                       | A.D. 1998                                       | 36.9500000          | 41.5000000           | 3                             | 1                       | 16.4333092                     | 16.3639864                        |
| Tell Brak (GPS_828) <sup>B</sup>   | Syria                      | 46      | Modern                       | A.D. 2000                                       | 36.6660000          | 41.0560000           | 13                            | 1                       | 14.9521949                     | 14.1634173                        |
| Tell Abyad (GPS_755) <sup>B</sup>  | Syria                      | 45      | Modern                       | A.D. 2000                                       | 36.6469000          | 39.0460000           | 11                            | 1                       | 14.3295985                     | 13.820599                         |
| GPS_17 <sup>B</sup>                | Syria                      | 39      | Modern                       | A.D. 2000                                       | 32.8700000          | 36.6600000           | 16                            | 1                       | 15.1682793                     | 14.7763616                        |
| Summakiak (GPS_50) <sup>B</sup>    | Syria                      | 43      | Modern                       | A.D. 2000                                       | 32.4280000          | 36.4050000           | 8                             | 1                       | 13.8084402                     | 13.3088459                        |
| Tell Bderi <sup>B</sup>            | Syria                      | 51      | Modern                       | A.D. 1998                                       | 36.3700000          | 40.8100000           | 11                            | 1                       | 14.4114219                     | 14.0474723                        |
| Malhat ed Deru <sup>B</sup>        | Syria                      | 48      | Modern                       | A.D. 1998                                       | 35.9333300          | 40.3500000           | 15                            | 2                       | 14.6340433                     | 14.1612345                        |
| Chogha Golan <sup>C</sup>          | Iran                       | 5       | Aceramic                     | Early to Mid Holocene                           | 33.3775167          | 46.2709694           | 73                            | 13                      | 16.4047766                     | 14.1555426                        |
| Mezraa Teleilat Höyük <sup>D</sup> | Turkey                     | 14      | PPN-middle PN                | 6900–6000 B.C.                                  | 36.9705600          | 37.9976841           | 22                            | 3                       | 17.0934626                     | 15.4317058                        |
| Ain Rahub <sup>D</sup>             | Jordan                     | 2       | Yarmoukian                   | 6300–6200 B.C.                                  | 32.6319440          | 35.9397220           | 10                            | 1                       | 17.1740884                     | 16.5457897                        |
| Tell Tawila <sup>C</sup>           | Syria                      | 28      | Middle to Late Halaf period  | 5600–5400 B.C.                                  | 36.5166600          | 39.5000000           | 41                            | 4                       | 16.7560397                     | 14.4459038                        |
| Umm Qseir <sup>E</sup>             | Syria                      | 31      | Halaf period                 | 5400–4800 B.C.                                  | 36.3800000          | 40.8500000           | 7                             | 2                       | 16.5917478                     | 15.1966003                        |
| Mashnaqa <sup>E</sup>              | Syria                      | 13      | Ubaid period                 | 5200–4900 B.C.                                  | 36.2884250          | 40.7946400           | 13                            | 3                       | 16.6678529                     | 15.0184718                        |
| Shir <sup>D</sup>                  | Syria                      | 18      | Late Neolithic               | 5000–4200 B.C.                                  | 35.1994400          | 36.6222200           | 8                             | 3                       | 16.9035724                     | 15.7896108                        |
| Tell Kuran <sup>E</sup>            | Syria                      | 26      | Ubaid period                 | 4700–4600 B.C.                                  | 36.5854800          | 40.4162100           | 14                            | 3                       | 16.9372479                     | 14.0463225                        |
| Ziyade <sup>E</sup>                | Syria                      | 36      | PN                           | 4700–4300 B.C.                                  | 36.4300000          | 40.8333300           | 26                            | 5                       | 16.3803884                     | 13.7107012                        |
| Abu Hamid <sup>D</sup>             | Jordan                     | 1       | Late Neolithic/ Chalcolithic | 4600–4000 B.C.                                  | 32.3200000          | 35.5500000           | 19                            | 3                       | 17.1991992                     | 14.6805142                        |
| Tell Beydar III <sup>D</sup>       | Syria                      | 22      | Late Chalcolithic            | 4300–3700 B.C.                                  | 36.7377780          | 40.5869440           | 40                            | 4                       | 16.9713472                     | 13.6524815                        |
| Tell esh-Shuna <sup>D</sup>        | Jordan                     | 19      | EB I to Late Chalcolithic    | Early Bronze Age (first half)<br>3950–3200 B.C. | 32.6500000          | 35.6800000           | 12                            | 2                       | 15.971836                      | 13.6442486                        |
| Tell Shioukh Faouqani              | Syria                      | 17      | EB I to Late Chalcolithic    | 3300–3000 B.C.                                  | 36.7800000          | 38.0300000           | 5                             | 1                       | 15.6967428                     | 14.9149593                        |
| Qatna <sup>C</sup>                 | Syria                      | 34      | Early Bronze Age (Midlate)   | 3000–2500 B.C.                                  | 34.8500000          | 36.8500000           | 55                            | 6                       | 16.5809126                     | 14.8992724                        |
| Tell 'el Abd <sup>C</sup>          | Syria                      | 33      | Early Bronze Age             | 3000–2500 B.C.                                  | 36.2500000          | 38.1800000           | 23                            | 4                       | 17.5602882                     | 14.3606798                        |
| Hirbet ez-Zeraqon <sup>C</sup>     | Jordan                     | 9       | Early Bronze Age II-III      | 3000–2500 B.C.                                  | 32.6000000          | 35.9300000           | 24                            | 8                       | 16.7987388                     | 13.9408697                        |
| Tell Fadous <sup>C</sup>           | Lebanon                    | 23      | Early Bronze Age             | 2900–2600 B.C.                                  | 34.2800000          | 35.6500000           | 10                            | 3                       | 18.0826367                     | 16.4923021                        |
| Tell Raqar <sup>E</sup>            | Syria                      | 27      | Early Bronze Age             | 2800–2600 B.C.                                  | 36.4300000          | 40.8700000           | 38                            | 6                       | 16.7516628                     | 13.8541721                        |
| Tell Atij <sup>E</sup>             | Syria                      | 21      | Early Bronze Age             | 2800–2500 B.C.                                  | 36.4300000          | 40.8500000           | 26                            | 3                       | 16.3970733                     | 14.0835974                        |
| Tell Kerma <sup>E</sup>            | Syria                      | 25      | Early Bronze Age             | 2900–2500 B.C.                                  | 36.5200000          | 40.8000000           | 16                            | 3                       | 15.877439                      | 14.0911499                        |

Table S1. Cont.

| Site                           | Modern political geography | Map no. | Cultural typology                  | Chronological range (mean values)                | Geographic latitude | Geographic longitude | No. of barley grains measured | No. of contextual units | Mean $\Delta^{13}\text{C}$ , ‰ | Minimum $\Delta^{13}\text{C}$ , ‰ |
|--------------------------------|----------------------------|---------|------------------------------------|--------------------------------------------------|---------------------|----------------------|-------------------------------|-------------------------|--------------------------------|-----------------------------------|
| Tell Mozan <sup>C</sup>        | Syria                      | 35      | Early Bronze Age (FG III)          | ca. 2500 B.C.                                    | 37.1200000          | 40.9300000           | 12                            | 4                       | 17.5066028                     | 16.5190836                        |
| Emar <sup>C</sup>              | Syria                      | 7       | Early Bronze Age (Midlate)         | Early Bronze Age (second half)<br>2400–2100 B.C. | 36.0300000          | 38.0800000           | 11                            | 2                       | 16.1545588                     | 14.0074217                        |
| Dilkaya Höyük <sup>A</sup>     | Turkey                     | 6       | EBA II-III                         | 2400–2000 B.C.                                   | 38.3600000          | 43.1400000           | 28                            | 3                       | 16.2902791                     | 13.879441                         |
| Kinet Höyük <sup>C</sup>       | Turkey                     | 12      | Early Bronze Age (Late)            | ca. 2200 B.C.                                    | 36.9300000          | 36.1200000           | 3                             | 1                       | 17.9847156                     | 17.4322203                        |
| Tell Tweini <sup>F</sup>       | Syria                      | 29      | Early Bronze Age (Late)            | ca. 2100 B.C.                                    | 35.3716700          | 35.9363900           | 4                             | 1                       | 16.9128464                     | 15.8698437                        |
| Tell Mozan <sup>C</sup>        | Syria                      | 35      | EBA/MBA                            | 2100–2000 B.C.                                   | 37.1200000          | 40.9300000           | 18                            | 3                       | 16.8412607                     | 15.5801282                        |
| Qatna <sup>C</sup>             | Syria                      | 34      | (FG IV-AG I)<br>EBA/MBA transition | ca. 2000 B.C.                                    | 34.8500000          | 36.8500000           | 10                            | 1                       | 15.6886883                     | 14.7872857                        |
| Emar <sup>C</sup>              | Syria                      | 7       | Middle Bronze Age                  | Middle Bronze Age                                | 36.0300000          | 38.0800000           | 11                            | 2                       | 15.7095316                     | 13.4911378                        |
| Qatna <sup>C</sup>             | Syria                      | 34      | Middle Bronze Age                  | 1900–1700 B.C.                                   | 34.8500000          | 36.8500000           | 71                            | 9                       | 16.6744239                     | 13.7663444                        |
| Kinet Höyük <sup>C</sup>       | Turkey                     | 12      | Middle Bronze Age                  | ca. 1800 B.C.                                    | 36.9300000          | 36.1200000           | 20                            | 4                       | 17.3527386                     | 15.9177324                        |
| Tell Tweini <sup>F</sup>       | Syria                      | 29      | Middle Bronze Age (I)              | 1800–1600 B.C.                                   | 35.3716700          | 35.9363900           | 15                            | 3                       | 16.9373373                     | 15.4898488                        |
| Tell Shioikh Faouqani          | Syria                      | 17      | Middle/Late Bronze Age             | Late Bronze Age                                  | 36.7800000          | 38.0300000           | 4                             | 1                       | 16.4832731                     | 14.1582062                        |
| Bogazköy <sup>P</sup>          | Turkey                     | 3       | LBA (Hittite)                      | 1600–1500 B.C.                                   | 40.0200000          | 34.6700000           | 25                            | 3                       | 16.9653747                     | 15.5848741                        |
| Tell Tweini <sup>F</sup>       | Syria                      | 29      | LBA II                             | 1300–1100 B.C.                                   | 35.3716700          | 35.9363900           | 8                             | 2                       | 17.0891655                     | 16.1197576                        |
| Tell Atchana <sup>C</sup>      | Turkey                     | 20      | Late Bronze Age                    | 1400–1200 B.C.                                   | 36.3200000          | 36.4800000           | 22                            | 6                       | 17.3974213                     | 15.3409571                        |
| Emar <sup>C</sup>              | Syria                      | 7       | Late Bronze Age                    | 1400–1200 B.C.                                   | 36.0300000          | 38.0800000           | 8                             | 2                       | 16.0324325                     | 14.2120876                        |
| Qatna <sup>C</sup>             | Syria                      | 34      | Late Bronze Age                    | ca. 1400 B.C.                                    | 34.8500000          | 36.8500000           | 4                             | 1                       | 15.9835062                     | 15.3197609                        |
| Tell Shioikh Faouqani          | Syria                      | 17      | Late Bronze Age I                  | 1200–1100 B.C.                                   | 36.7800000          | 38.0300000           | 5                             | 1                       | 16.9625731                     | 15.9102458                        |
| Tell Halaf <sup>C</sup>        | Syria                      | 24      | Iron Age IA-IIB/C                  | Iron Age                                         | 36.8261911          | 40.0395045           | 42                            | 3                       | 16.4965324                     | 14.6058829                        |
| Tell Tweini <sup>F</sup>       | Syria                      | 29      | Iron Age I/II                      | 1050–850 B.C.                                    | 35.3716700          | 35.9363900           | 6                             | 2                       | 17.411873                      | 16.1442538                        |
| Gordion <sup>A</sup>           | Turkey                     | 8       | Iron Age (early)                   | 1050–800 B.C.                                    | 39.6501033          | 31.9785698           | 30                            | 2                       | 16.3328641                     | 13.3373176                        |
| Qubur al-Walayida <sup>C</sup> | Israel                     | 16      | Iron Age I-II                      | 1000–950 B.C.                                    | 31.4125000          | 34.5341670           | 10                            | 1                       | 16.6558228                     | 15.5336492                        |
| Nerik <sup>C</sup>             | Turkey                     | 15      | Iron Age                           | 1000–700 B.C.                                    | 41.1833300          | 35.4333300           | 23                            | 3                       | 17.1205405                     | 15.2392384                        |
| Kamid el-Loz <sup>C</sup>      | Lebanon                    | 11      | Iron Age I-II                      | ca. 950 B.C.                                     | 33.6238185          | 35.8214337           | 11                            | 1                       | 16.3199706                     | 15.1930562                        |
| Tell Shioikh Faouqani          | Syria                      | 17      | Iron Age II                        | 900–700 B.C.                                     | 36.7800000          | 38.0300000           | 5                             | 1                       | 16.8126565                     | 14.5074214                        |
| Tel Burna <sup>C</sup>         | Israel                     | 53      | Iron Age                           | 750–500 B.C.                                     | 31.6339440          | 34.8678580           | 20                            | 5                       | 17.8260335                     | 14.5469808                        |

Superscript letters refer to researchers who provided the material: A, Mark Nesbitt; B, F.H.; C, S.R.; D, Reinder Neef; E, Joy McCorriston; and F, Elena Marinova. Data from Tell Shioikh Faouqani [Riehl S, Ferris JP, Willcox G (2007) Stable carbon isotope evidence of changing water stress on cereal crops in ancient agricultural societies in the Near East (5300–2000 BP), Poster Presentation, Annual Meeting of the Stable Isotope Mass Spectrometry User Group (SIMSUG), June 20–22, 2007, Newcastle, UK].
